# Supplementary material for: Reprogramming of miR-181a/DNA methylation patterns contribute to the maternal nicotine exposure-induced fetal programming of cardiac ischemia-sensitive phenotype in postnatal life
Source: Theranostics. 2020 Sep 26;10(25):11820–36. doi: 10.7150/thno.48297 (PMC7546014; doi:10.7150/thno.48297)
Supplement: Supplementary file 1 — Supplementary figures and tables. [file thnov10p11820s1.pdf]

## Supplemental Data

### **Reprogramming of miR-181a/DNA methylation patterns contribute to the maternal nicotine exposure-induced fetal programming of cardiac ischemia-sensitive phenotype in postnatal life**

Jie Jian<sup>1,2</sup>, Peng Zhang<sup>1</sup>, Yong Li<sup>1</sup>, Bailin Liu<sup>1</sup>, Yanyan Zhang<sup>1</sup>, Lubo Zhang<sup>1</sup>, Xuesi M Shao<sup>3</sup>, Jian Zhuang<sup>2</sup>, and Daliao Xiao<sup>1</sup>

<sup>1</sup> Lawrence D. Longo, MD Center for Perinatal Biology, Department of Basic Sciences, Loma Linda University School of Medicine, Loma Linda, California, USA

<sup>2</sup> Department of Cardiac Surgery, Guangdong Cardiovascular Institute, Guangdong Provincial People's Hospital, Guangdong Academy of Medical Sciences, Guangzhou, China

<sup>3</sup> Department of Neurobiology, David Geffen School of Medicine at UCLA, University of California at Los Angeles, Los Angeles, California, USA

#### **a) Corresponding authors:**

Daliao Xiao, PhD  
Center for Perinatal Biology  
Department of Basic Sciences  
Loma Linda University School of Medicine  
Loma Linda, CA 92350  
Tel: 909-558-4325, Fax: 909-558-4029  
E-mail: [Dxiao@llu.edu](mailto:Dxiao@llu.edu)

Jian Zhuang, MD  
Department of Cardiac Surgery  
Guangdong Cardiovascular Institute  
Guangdong Provincial People's Hospital  
Guangdong Academy of Medical Sciences  
Guangzhou, China 510000  
Tel: 86 020 83827812  
E-mail: [zhuangj0130@163.com](mailto:zhuangj0130@163.com)

|            | Baseline         |                    | 1 Day after I/R |                   | 7 Days after I/R |                   |
|------------|------------------|--------------------|-----------------|-------------------|------------------|-------------------|
|            | Saline<br>(n=10) | Nicotine<br>(n=10) | Saline<br>(n=5) | Nicotine<br>(n=6) | Saline<br>(n=4)  | Nicotine<br>(n=4) |
| IVSdd(cm)  | 0.171 ± 0.008    | 0.155 ± 0.007      | 0.180 ± 0.004   | 0.165 ± 0.009     | 0.155 ± 0.009    | 0.158 ± 0.008     |
| IVSsd (cm) | 0.261 ± 0.011    | 0.248 ± 0.007      | 0.185 ± 0.009   | 0.176 ± 0.014     | 0.165 ± 0.009    | 0.218 ± 0.027     |
| LVEDD(cm)  | 0.589 ± 0.021    | 0.573 ± 0.014      | 0.620 ± 0.042   | 0.607 ± 0.027     | 0.630 ± 0.015    | 0.663 ± 0.011     |
| LVESD(cm)  | 0.321 ± 0.020    | 0.304 ± 0.018      | 0.416 ± 0.027   | 0.423 ± 0.023     | 0.433 ± 0.019    | 0.460 ± 0.011     |
| LVPWd(cm)  | 0.221 ± 0.018    | 0.215 ± 0.007      | 0.210 ± 0.020   | 0.187 ± 0.009     | 0.178 ± 0.015    | 0.205 ± 0.013     |
| LVPWs(cm)  | 0.276 ± 0.007    | 0.299 ± 0.010      | 0.272 ± 0.019   | 0.248 ± 0.012     | 0.270 ± 0.021    | 0.275 ± 0.021     |
| LVEDV(ml)  | 0.490 ± 0.053    | 0.445 ± 0.032      | 0.610 ± 0.094   | 0.537 ± 0.065     | 0.580 ± 0.036    | 0.700 ± 0.012*    |
| LVESV(ml)  | 0.089 ± 0.016    | 0.080 ± 0.013      | 0.214 ± 0.037   | 0.193 ± 0.030     | 0.200 ± 0.025    | 0.248 ± 0.015     |
| EF(%)      | 81.89 ± 2.314    | 82.28 ± 2.641      | 65.61 ± 1.724   | 64.41 ± 2.110     | 65.79 ± 2.281    | 64.55 ± 2.392     |
| FS(%)      | 45.83 ± 2.599    | 46.51 ± 2.873      | 33.30 ± 1.637   | 30.77 ± 1.484     | 31.72 ± 1.542    | 31.94 ± 1.600     |
| SV(ml)     | 0.401 ± 0.042    | 0.364 ± 0.028      | 0.366 ± 0.055   | 0.342 ± 0.036     | 0.380 ± 0.015    | 0.478 ± 0.022*    |
| HR(bpm)    | 385.0 ± 12.79    | 362.8 ± 19.07      | 444.6 ± 8.07    | 400.0 ± 20.61     | 389.5 ± 22.02    | 350.0 ± 23.51     |

**Table S1. Effect of PNE on LV parameters determined by echocardiography in female offspring on baseline, 1 day before I/R, 1 day after I/R, 7 days after I/R**

**Note:** IVSdd/ IVSsd, interventricular septal end diastolic/systolic dimension; LVEDD/ LVESD, left ventricular end diastolic/systolic dimension; LVPWd/ LVPWs, left ventricular posterior wall thickness at end diastole/systole; EF, ejection fraction; FS, fractional shortening; SV, stroke volume; LVEDV/ LVESV, left ventricular end-diastolic/ systolic volume; HR, heart rate; \* $P < 0.05$  versus saline control group, as determined by Student's t-test.

|            | Baseline         |                    | 1 Day before I/R |                    | 1 Day after I/R |                   | 7 Days after I/R |                   |
|------------|------------------|--------------------|------------------|--------------------|-----------------|-------------------|------------------|-------------------|
|            | Saline<br>(n=10) | Nicotine<br>(n=10) | Saline<br>(n=10) | Nicotine<br>(n=10) | Saline<br>(n=9) | Nicotine<br>(n=9) | Saline<br>(n=5)  | Nicotine<br>(n=3) |
| IVSdd(cm)  | 0.169 ± 0.003    | 0.151 ± 0.004*     | 0.184 ± 0.005    | 0.139 ± 0.003*     | 0.178 ± 0.005   | 0.160 ± 0.006*    | 0.183 ± 0.012    | 0.142 ± 0.002*    |
| IVSsd (cm) | 0.302 ± 0.006    | 0.248 ± 0.008*     | 0.309 ± 0.012    | 0.244 ± 0.008*     | 0.250 ± 0.010   | 0.205 ± 0.013*    | 0.259 ± 0.017    | 0.195 ± 0.023     |
| LVEDD(cm)  | 0.690 ± 0.022    | 0.670 ± 0.024      | 0.704 ± 0.015    | 0.695 ± 0.025      | 0.744 ± 0.013   | 0.725 ± 0.018     | 0.739 ± 0.016    | 0.761 ± 0.042     |
| LVESD(cm)  | 0.361 ± 0.017    | 0.386 ± 0.019      | 0.361 ± 0.018    | 0.403 ± 0.017      | 0.478 ± 0.010   | 0.513 ± 0.005*    | 0.483 ± 0.011    | 0.544 ± 0.015*    |
| LVPWd(cm)  | 0.248 ± 0.012    | 0.224 ± 0.012      | 0.250 ± 0.008    | 0.232 ± 0.012      | 0.241 ± 0.015   | 0.232 ± 0.012     | 0.238 ± 0.008    | 0.216 ± 0.006     |
| LVPWs(cm)  | 0.320 ± 0.010    | 0.284 ± 0.006*     | 0.329 ± 0.011    | 0.291 ± 0.010*     | 0.316 ± 0.011   | 0.276 ± 0.013*    | 0.297 ± 0.009    | 0.264 ± 0.013     |
| LVEDV(ml)  | 0.764 ± 0.062    | 0.705 ± 0.069      | 0.802 ± 0.046    | 0.783 ± 0.071      | 0.924 ± 0.041   | 0.864 ± 0.058     | 0.916 ± 0.054    | 1.005 ± 0.149     |
| LVESV(ml)  | 0.126 ± 0.015    | 0.154 ± 0.021      | 0.128 ± 0.018    | 0.170 ± 0.018      | 0.265 ± 0.014   | 0.326 ± 0.009*    | 0.280 ± 0.019    | 0.390 ± 0.029*    |
| EF(%)      | 84.53 ± 0.743    | 79.02 ± 1.047*     | 84.52 ± 1.562    | 78.27 ± 1.219*     | 70.80 ± 1.612   | 61.27 ± 2.086*    | 69.79 ± 0.619    | 59.85 ± 2.901*    |
| FS(%)      | 48.10 ± 0.985    | 42.06 ± 0.967*     | 49.01 ± 1.852    | 42.05 ± 1.115*     | 35.75 ± 1.246   | 28.85 ± 1.435*    | 34.82 ± 0.454    | 28.10 ± 1.950*    |
| SV(ml)     | 0.687 ± 0.028    | 0.587 ± 0.027*     | 0.675 ± 0.033    | 0.576 ± 0.031*     | 0.583 ± 0.023   | 0.472 ± 0.029*    | 0.572 ± 0.018    | 0.426 ± 0.055*    |
| HR(bpm)    | 371.2 ± 13.05    | 352.7 ± 8.40       | 342.1 ± 11.66    | 342.1 ± 8.81       | 374.3 ± 10.15   | 377.3 ± 7.62      | 359.4 ± 16.48    | 374.1 ± 28.97     |

**Table S2. Effect of PNE on LV parameters determined by echocardiography in male offspring on baseline, 1 day before I/R, 1 day after I/R, 7 days after I/R**

**Note:** IVSdd/ IVSsd, interventricular septal end diastolic/systolic dimension; LVEDD/ LVESD, left ventricular end diastolic/systolic dimension; LVPWd/ LVPWs, left ventricular posterior wall thickness at end diastole/systole; EF, ejection fraction; FS, fractional shortening; SV, stroke volume; LVEDV/ LVESV, left ventricular end-diastolic/ systolic volume; HR, heart rate; \* $P < 0.05$  versus saline control group, as determined by Student's t-test.

|            | Baseline         |                    | 1 Day before I/R |                   | 1 Day after I/R |                   | 7 Days after I/R |                   |
|------------|------------------|--------------------|------------------|-------------------|-----------------|-------------------|------------------|-------------------|
|            | Saline<br>(n=10) | Nicotine<br>(n=10) | Saline<br>(n=9)  | Nicotine<br>(n=7) | Saline<br>(n=9) | Nicotine<br>(n=9) | Saline<br>(n=4)  | Nicotine<br>(n=5) |
| IVSdd(cm)  | 0.167 ± 0.006    | 0.139 ± 0.007*     | 0.172 ± 0.004    | 0.153 ± 0.006*    | 0.170 ± 0.005   | 0.144 ± 0.003*    | 0.171 ± 0.003    | 0.149 ± 0.006*    |
| IVSsd (cm) | 0.290 ± 0.007    | 0.231 ± 0.008*     | 0.309 ± 0.008    | 0.272 ± 0.011*    | 0.223 ± 0.011   | 0.219 ± 0.009     | 0.255 ± 0.010    | 0.228 ± 0.009     |
| LVEDD(cm)  | 0.652 ± 0.019    | 0.640 ± 0.023      | 0.669 ± 0.011    | 0.652 ± 0.021     | 0.712 ± 0.016   | 0.715 ± 0.015     | 0.775 ± 0.034    | 0.751 ± 0.028     |
| LVESD(cm)  | 0.332 ± 0.014    | 0.361 ± 0.014      | 0.356 ± 0.013    | 0.342 ± 0.015     | 0.464 ± 0.014   | 0.479 ± 0.017     | 0.483 ± 0.011    | 0.509 ± 0.023     |
| LVPWd(cm)  | 0.233 ± 0.009    | 0.208 ± 0.008      | 0.220 ± 0.006    | 0.215 ± 0.009     | 0.255 ± 0.014   | 0.246 ± 0.013     | 0.221 ± 0.010    | 0.210 ± 0.015     |
| LVPWs(cm)  | 0.313 ± 0.010    | 0.260 ± 0.009*     | 0.344 ± 0.007    | 0.315 ± 0.016     | 0.288 ± 0.016   | 0.258 ± 0.015     | 0.279 ± 0.029    | 0.243 ± 0.011     |
| LVEDV(ml)  | 0.651 ± 0.053    | 0.620 ± 0.056      | 0.709 ± 0.035    | 0.621 ± 0.057     | 0.819 ± 0.051   | 0.832 ± 0.049     | 1.040 ± 0.117    | 0.966 ± 0.099     |
| LVESV(ml)  | 0.100 ± 0.012    | 0.122 ± 0.012      | 0.119 ± 0.012    | 0.136 ± 0.039     | 0.248 ± 0.021   | 0.279 ± 0.026     | 0.309 ± 0.038    | 0.325 ± 0.042     |
| EF(%)      | 85.24 ± 0.730    | 79.86 ± 1.682*     | 83.60 ± 0.996    | 82.44 ± 1.792     | 69.64 ± 1.293   | 67.14 ± 1.565     | 69.16 ± 1.766    | 66.34 ± 1.572     |
| FS(%)      | 49.25 ± 0.850    | 43.55 ± 1.448*     | 47.60 ± 1.114    | 46.58 ± 1.929     | 34.76 ± 0.948   | 32.97 ± 1.112     | 34.45 ± 1.260    | 32.47 ± 1.158     |
| SV(ml)     | 0.721 ± 0.016    | 0.679 ± 0.011*     | 0.570 ± 0.038    | 0.516 ± 0.049     | 0.513 ± 0.024   | 0.459 ± 0.017     | 0.503 ± 0.040    | 0.446 ± 0.019     |
| HR(bpm)    | 383.6 ± 10.18    | 362.4 ± 12.49      | 351.5 ± 19.60    | 365.8 ± 14.01     | 376.4 ± 15.10   | 393.5 ± 17.28     | 410.9 ± 19.79    | 394.2 ± 10.88     |

**Table S3. Effect of PNE on LV parameters determined by echocardiography in male offspring with LNA-miR-181a treatment on baseline, 1 day before I/R, 1 day after I/R, 7 days after I/R**

**Note:** IVSdd/ IVSsd, interventricular septal end diastolic/systolic dimension; LVEDD/ LVESD, left ventricular end diastolic/systolic dimension; LVPWd/ LVPWs, left ventricular posterior wall thickness at end diastole/systole; EF, ejection fraction; FS, fractional shortening; SV, stroke volume; LVEDV/ LVESV, left ventricular end-diastolic/ systolic volume; HR, heart rate; \* $P < 0.05$  versus saline control group, as determined by Student's t-test.

|            | Baseline         |                    | 1 Day before I/R |                    | 1 Day after I/R |                   | 7 Days after I/R |                   |
|------------|------------------|--------------------|------------------|--------------------|-----------------|-------------------|------------------|-------------------|
|            | Saline<br>(n=11) | Scramble<br>(n=11) | Saline<br>(n=11) | Scramble<br>(n=11) | Saline<br>(n=5) | Scramble<br>(n=5) | Saline<br>(n=5)  | Scramble<br>(n=5) |
| IVSdd(cm)  | 0.135 ± 0.006    | 0.133 ± 0.003      | 0.137 ± 0.008    | 0.150 ± 0.005      | 0.146 ± 0.013   | 0.138 ± 0.009     | 0.134 ± 0.012    | 0.130 ± 0.009     |
| IVSsd (cm) | 0.255 ± 0.012    | 0.255 ± 0.009      | 0.278 ± 0.012    | 0.279 ± 0.008      | 0.212 ± 0.027   | 0.206 ± 0.014     | 0.216 ± 0.025    | 0.194 ± 0.014     |
| LVEDD(cm)  | 0.624 ± 0.024    | 0.638 ± 0.017      | 0.689 ± 0.015    | 0.711 ± 0.013      | 0.698 ± 0.025   | 0.730 ± 0.021     | 0.820 ± 0.034    | 0.836 ± 0.036     |
| LVESD(cm)  | 0.301 ± 0.018    | 0.313 ± 0.012      | 0.335 ± 0.013    | 0.353 ± 0.013      | 0.438 ± 0.023   | 0.470 ± 0.023     | 0.540 ± 0.025    | 0.560 ± 0.029     |
| LVPWd(cm)  | 0.215 ± 0.015    | 0.210 ± 0.007      | 0.195 ± 0.008    | 0.214 ± 0.011      | 0.210 ± 0.015   | 0.194 ± 0.007     | 0.206 ± 0.009    | 0.195 ± 0.021     |
| LVPWs(cm)  | 0.310 ± 0.016    | 0.318 ± 0.016      | 0.307 ± 0.009    | 0.329 ± 0.009      | 0.293 ± 0.029   | 0.276 ± 0.012     | 0.326 ± 0.013    | 0.308 ± 0.028     |
| LVEDV(ml)  | 0.580 ± 0.062    | 0.609 ± 0.047      | 0.749 ± 0.045    | 0.817 ± 0.042      | 0.690 ± 0.096   | 0.883 ± 0.072     | 1.218 ± 0.122    | 1.292 ± 0.137     |
| LVESV(ml)  | 0.082 ± 0.012    | 0.082 ± 0.010      | 0.102 ± 0.010    | 0.115 ± 0.013      | 0.235 ± 0.041   | 0.285 ± 0.033     | 0.384 ± 0.048    | 0.428 ± 0.059     |
| EF(%)      | 86.36 ± 1.074    | 86.67 ± 0.950      | 86.60 ± 0.986    | 86.24 ± 1.100      | 70.33 ± 1.563   | 67.77 ± 2.541     | 68.64 ± 1.676    | 67.10 ± 2.002     |
| FS(%)      | 50.74 ± 1.371    | 51.08 ± 1.232      | 51.17 ± 1.324    | 50.79 ± 1.376      | 35.08 ± 1.196   | 33.48 ± 1.871     | 34.17 ± 1.268    | 33.09 ± 1.409     |
| SV(ml)     | 0.498 ± 0.051    | 0.527 ± 0.041      | 0.648 ± 0.038    | 0.703 ± 0.033      | 0.530 ± 0.054   | 0.630 ± 0.056     | 0.838 ± 0.082    | 0.862 ± 0.089     |
| HR(bpm)    | 375.3 ± 15.82    | 405.8 ± 10.61      | 380.9 ± 15.20    | 379.9 ± 9.15       | 379.0 ± 16.98   | 381.7 ± 21.79     | 355.0 ± 31.14    | 356.7 ± 16.66     |

**Table S4. Effect of scrambled LNA-miR-181a on LV parameters determined by echocardiography in ~ 3-month-old male rats on baseline, 1 day before I/R, 1 day after I/R, 7 days after I/R**

**Note:** IVSdd/ IVSsd, interventricular septal end diastolic/systolic dimension; LVEDD/ LVESD, left ventricular end diastolic/systolic dimension; LVPWd/ LVPWs, left ventricular posterior wall thickness at end diastole/systole; EF, ejection fraction; FS, fractional shortening; SV, stroke volume; LVEDV/ LVESV, left ventricular end-diastolic/ systolic volume; HR, heart rate; \* $P < 0.05$  versus saline control group, as determined by Student's t-test.

**Figure S1. Effects of PNE on ischemia-reperfusion-induced heart infarct size in female offspring rats.** Rats were administered with either saline or nicotine from gestation day 4 until postnatal day 10. 3-month-old offspring rats from each group were subjected to 45 min of heart ischemia followed by reperfusion. For the infarction size, the hearts of rats were isolated 24 h after I/R and their infarct sizes in each rat group were determined with 2% TTC staining (A), (B) showing percent of left ventricle infarct size (infarct area/ left ventricle area x100%) in each offspring group (n=4 animals/group). \* $P < 0.05$  versus saline control group, as determined by Student's t-test.

**Figure S2. Effects of PNE on heart function in female offspring rats.** Rats were administered with either saline or nicotine from gestation day 4 until postnatal day 10. 3-month-old rats from each group were subjected to 45 min of heart ischemia followed by reperfusion. The representative echocardiographic images were obtained from different time periods including baseline (A), 1 day before I/R, 1 day after I/R, and 7 days after I/R. (B) left ventricular end-diastolic dimension (LVEDD), (C) left ventricular end-systolic dimension (LVESD), (D) percentage of ejection fraction (EF%), (E) percentage of fractional shortening (FS%) (n=4~10 animals/group). \* $P < 0.05$  versus saline control group, as determined by Student's t-test.

**Figure S3. Effects of scrambled LNA-miR-181a on heart function in male rats.** Rats were administered with either saline solution or scrambled LNA-miR-181a (negative control) 10 days before I/R. 3-month-old rats from each group were subjected to 45 min of heart ischemia followed by reperfusion. The representative echocardiographic images were obtained from different time periods including baseline (A), 1 day before I/R, 1 day after I/R, and 7 days after I/R. (B) left ventricular end-diastolic dimension (LVEDD), (C) left ventricular end-systolic dimension (LVESD), (D) percentage of ejection fraction (EF%), (E) percentage of fractional shortening (FS%) (n=5~11 animals/group). \* $P < 0.05$  versus saline control group, as determined by

Student's t-test.

**Figure S4. Effects of scrambled LNA-miR-181a on miR-181a levels in male rat and effect of PNE on miR-181b/c levels in offspring rats.** The total RNA samples were isolated from left ventricle tissues of either normal male rats or the male offspring rats from each group. Cardiac miR-181a, 181b, 181c levels were determined by qRT-PCR analysis as described in the Material and Methods. (A) miR-181a levels in the saline solution group and the scrambled LNA-miR-181a-treated rats (n=6 animals/group), (B) miR-181b levels in each group of offspring (n=6 animals/group), (C) miR-181c levels in each group of offspring (n=5-6 animals/group). Data are means  $\pm$  SEM. The expression levels of miR-181 family are normalized by SNOTD61. \*P < 0.05 versus saline control group, as determined by Student's t-test.

**Figure S5. A diagram showing the TGF- $\beta$ /Smad signaling pathway interaction with miR-181a in response to perinatal nicotine exposure (PNE).** PNE selectively enhances cardiac TGF- $\beta$ /Smad2/Smad3 expressions, which serve as transcriptional complexes in the nucleus to induce miR-181a expression. The enhanced miR-181a will target and suppress Smad7 expression, which, in turn, diminishes its negative feedback mechanism and consequently indirectly enhances TGF- $\beta$  signal pathway.

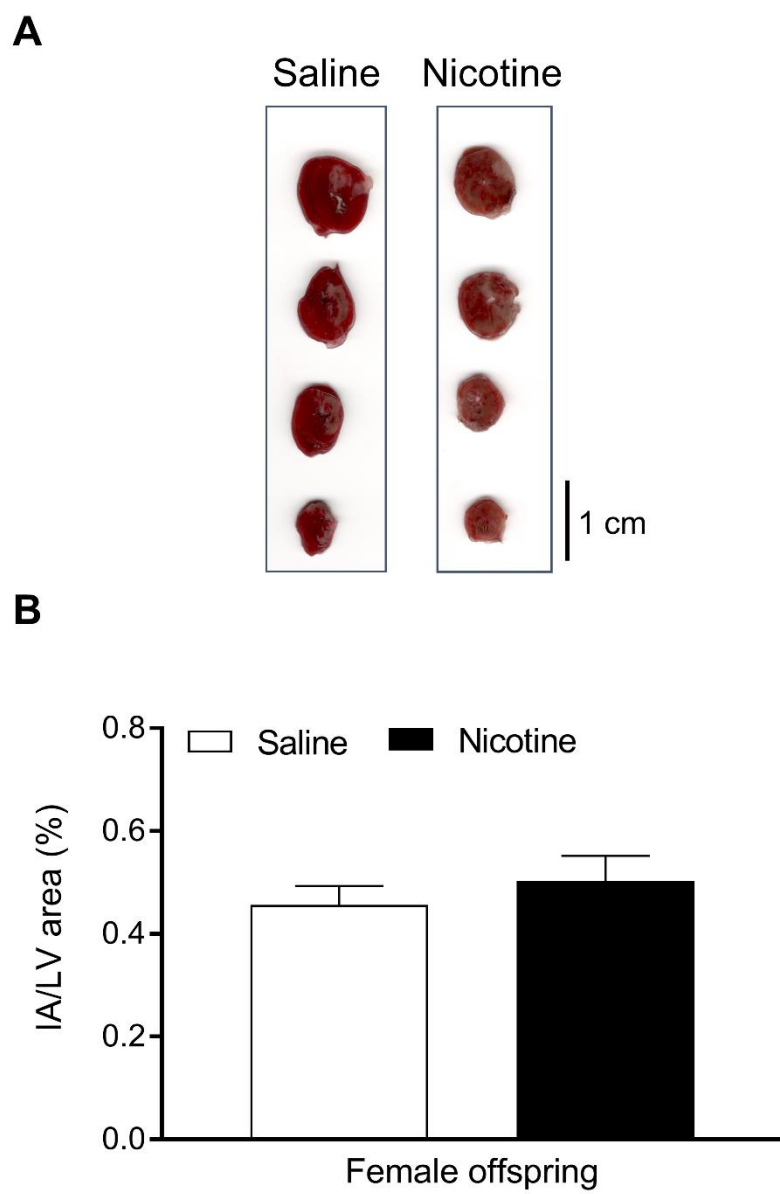

**Figure S1**

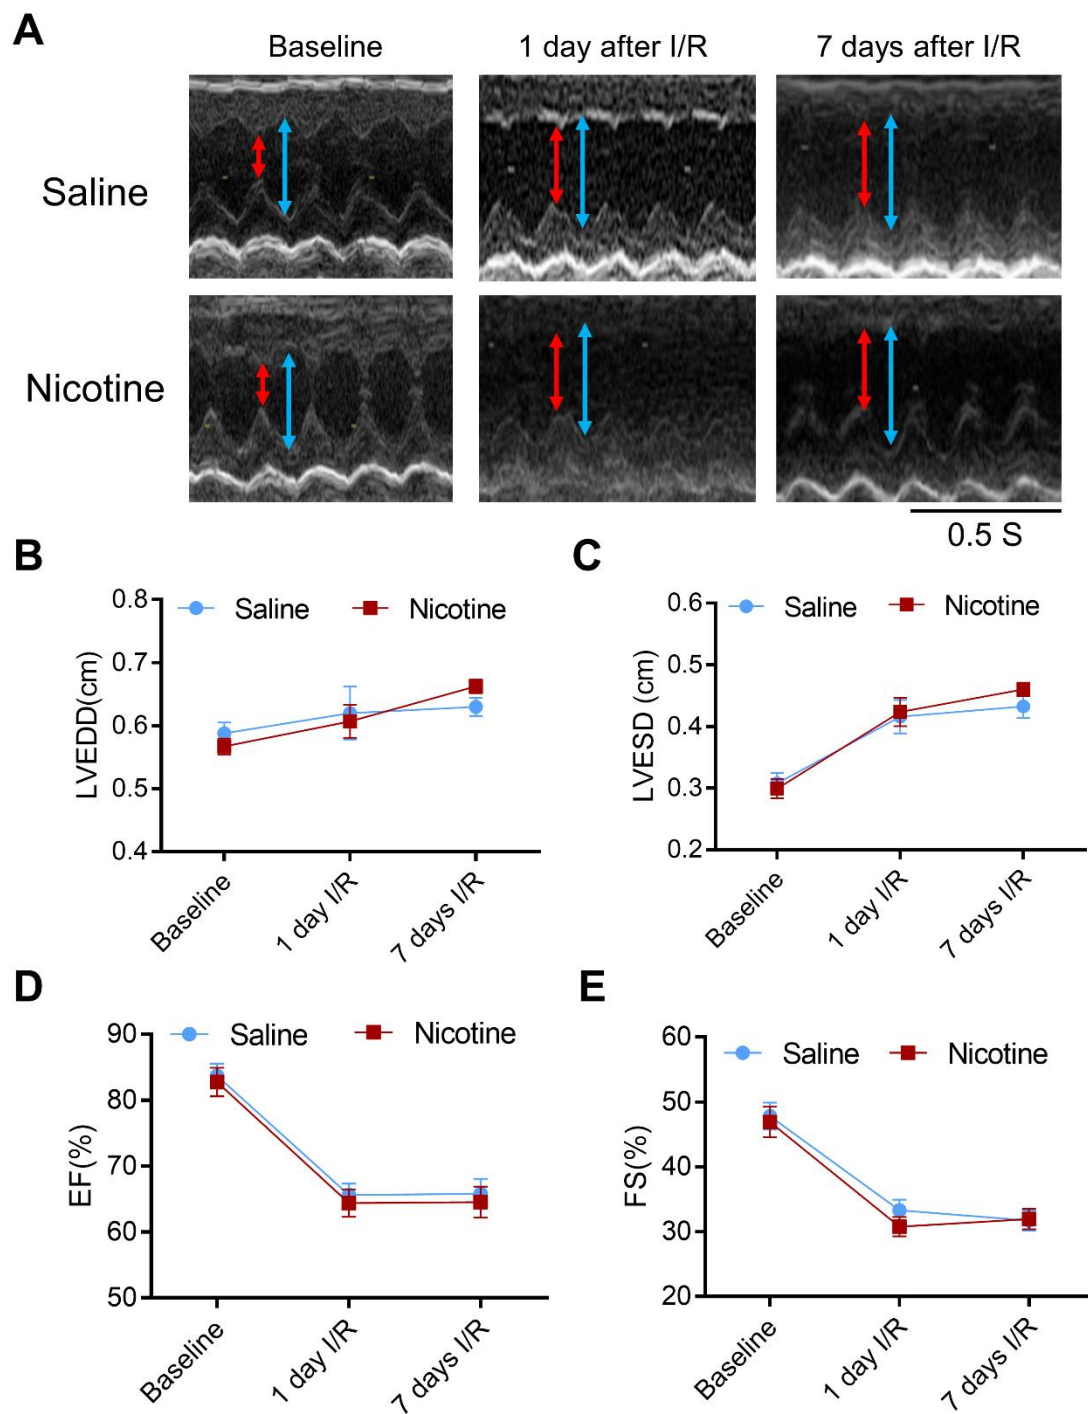

**Figure S2**

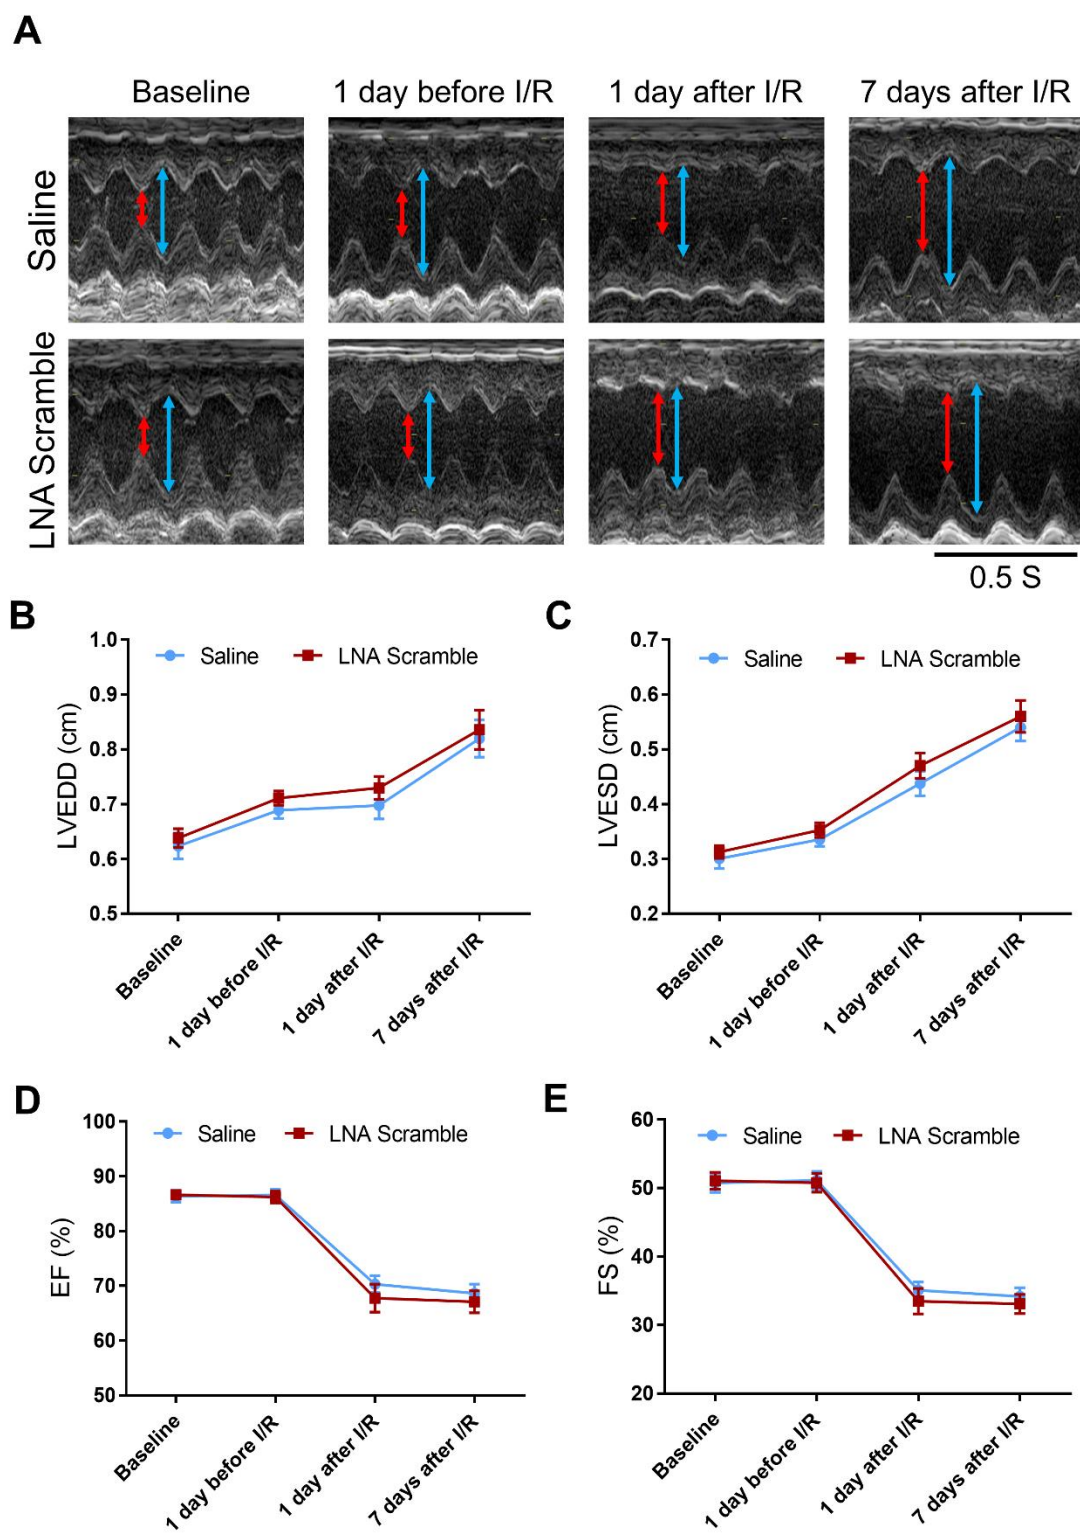

**Figure S3**

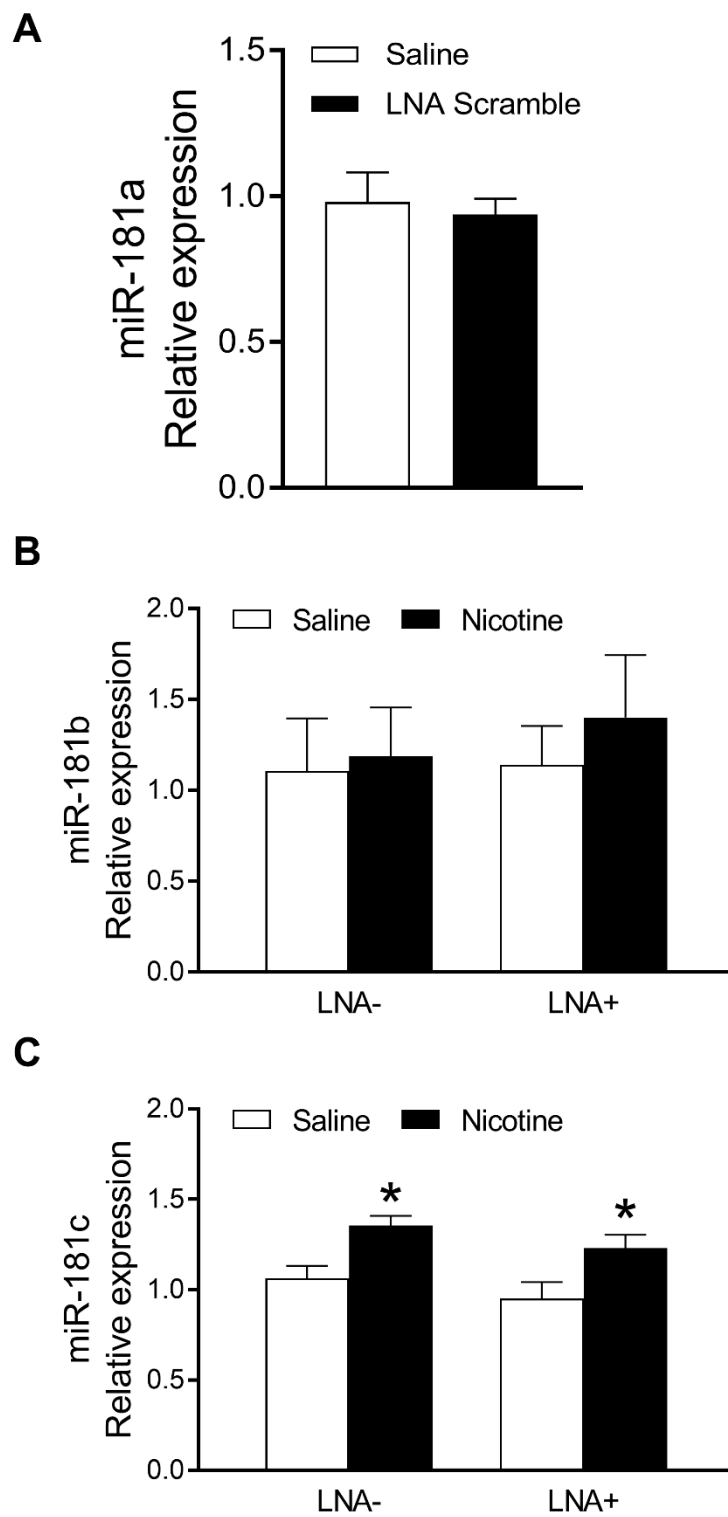

**Figure S4**

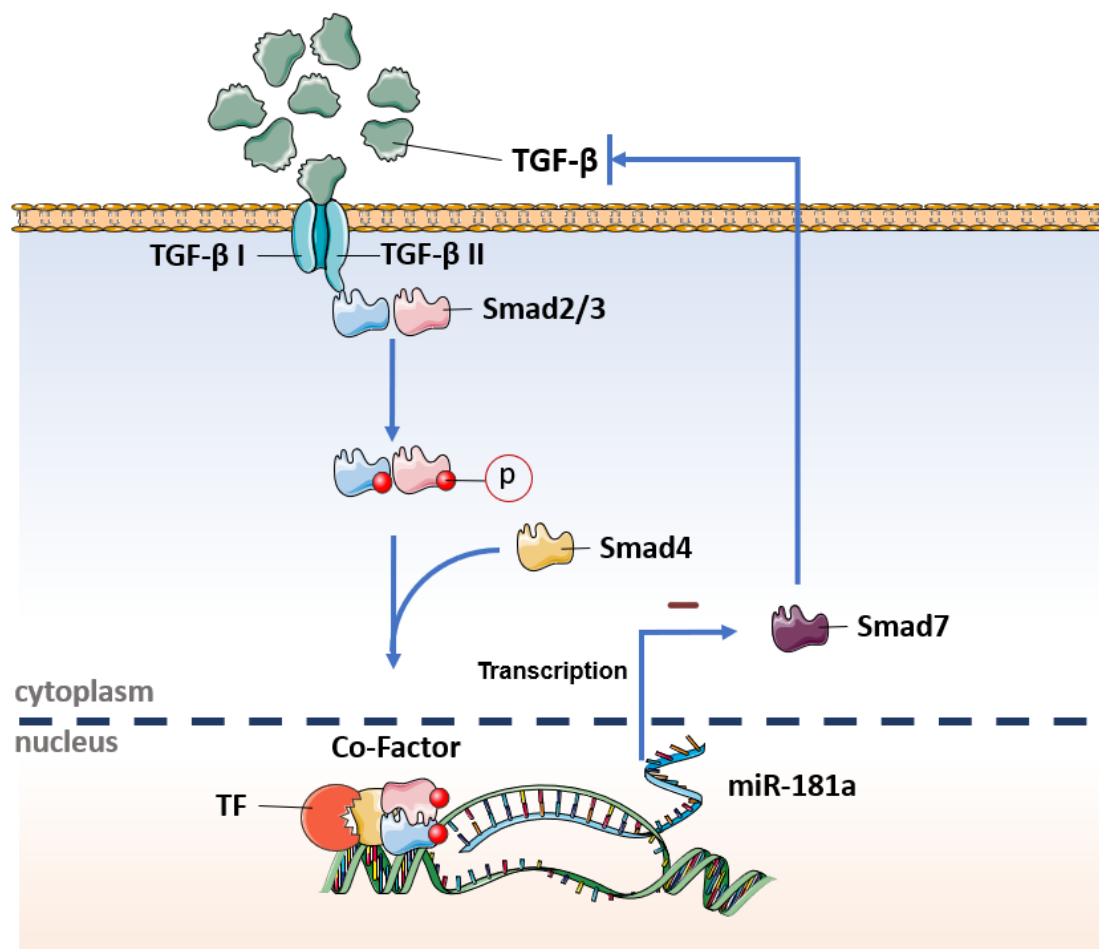

**Figure S5**
